# Supplementary material for: Hierarchical Cu-MOF hollow nanowire modified copper mesh for efficient antibacterial PM filtration
Source: Royal Society of Chemistry journal article supplement (doi:10.1039/d3qi00349c), 2023-01-01
Supplement: d3qi00349c1.pdf [file d3qi00349c1.pdf]

## Supporting Information

### Hierarchical Cu-MOF Hollow Nanowires Modified Copper Mesh for Efficient Antibacterial PM Filtration

*Haiyan Li,<sup>a</sup> Tao Wang,<sup>a,\*</sup> Yulong Ying,<sup>a</sup> Zhiqi Wang,<sup>a</sup> Lianjun Pan,<sup>b</sup> and Sheng  
Wang<sup>a,\*</sup>*

*<sup>a</sup>School of Materials Science and Engineering, Zhejiang Sci-Tech University,  
Hangzhou 310018, China*

*<sup>b</sup>Zhejiang Light Industrial Products Inspection And Research Institute, Hangzhou  
310000, China*

*E-mail address of the corresponding author:*

**Tao Wang:** wangtao@zstu.edu.cn; taotao571@hotmail.com;

**Sheng Wang:** wangsheng@zstu.edu.cn; wangsheng571@hotmail.com

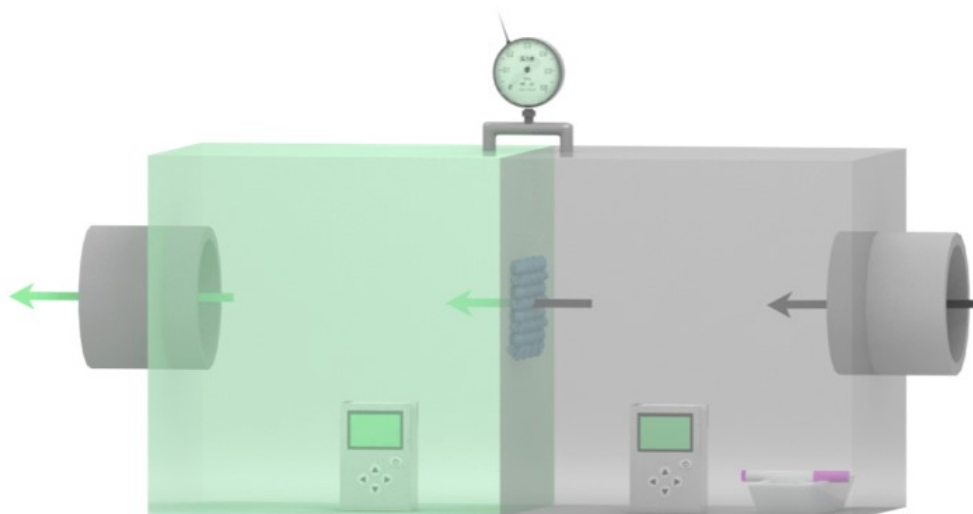

**Figure S1.** Home-made smoke tester for PM particles capture process.

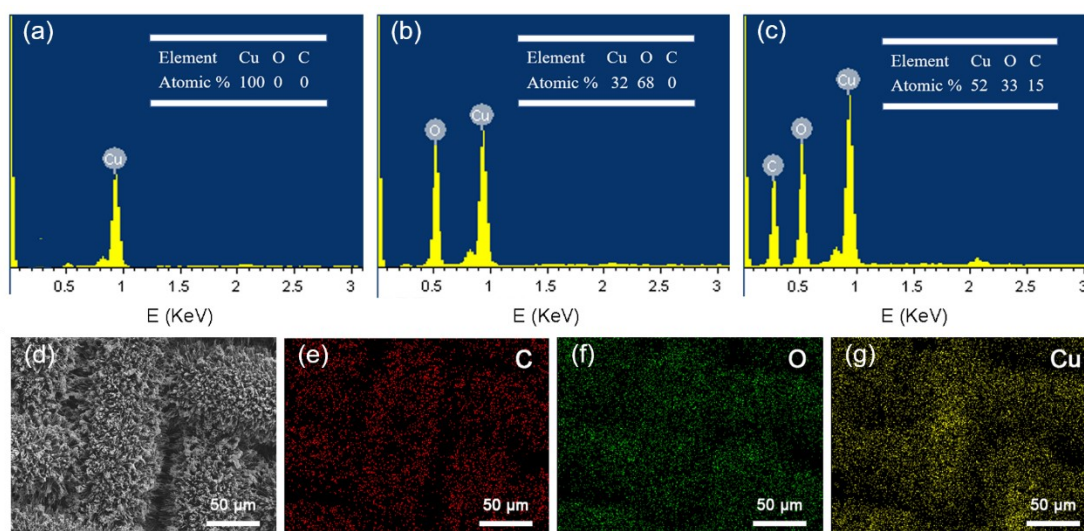

**Figure S2.** EDX spectra of the products obtained at different reaction processes. (a) pristine copper mesh, (b) CHM, and (c) CMM-70. (d) SEM image and EDS mapping of (e) C, (f) O, and (g) Cu elements of CMM-70.

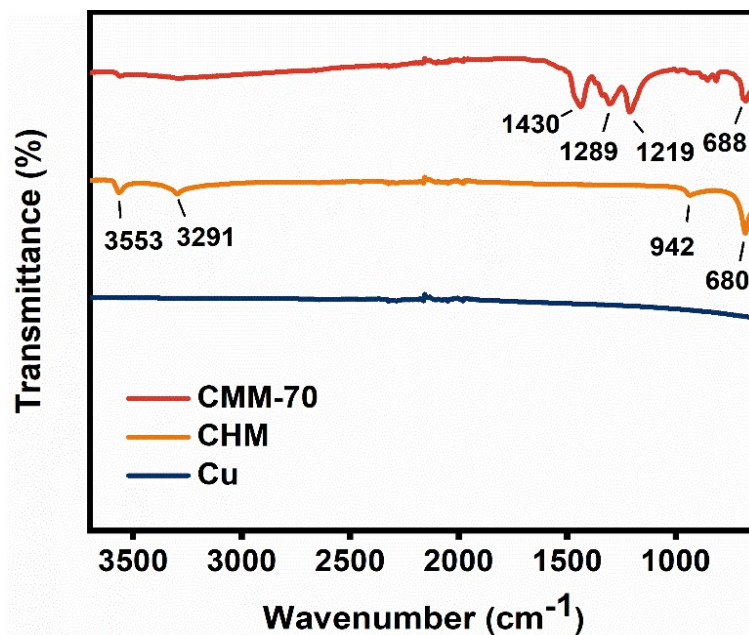

**Figure S3.** FTIR of the products obtained at different reaction processes, pristine copper mesh, CHM, and CMM-70.

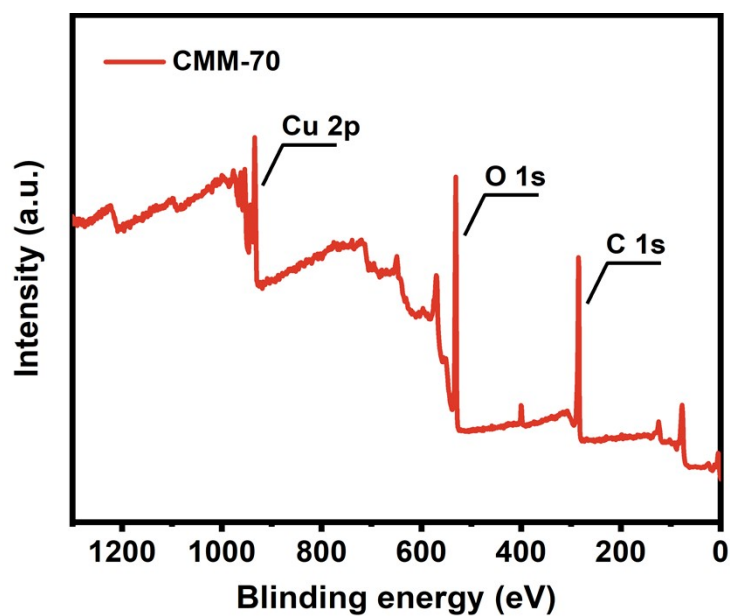

**Figure S4.** Survey spectrum of CMM-70.

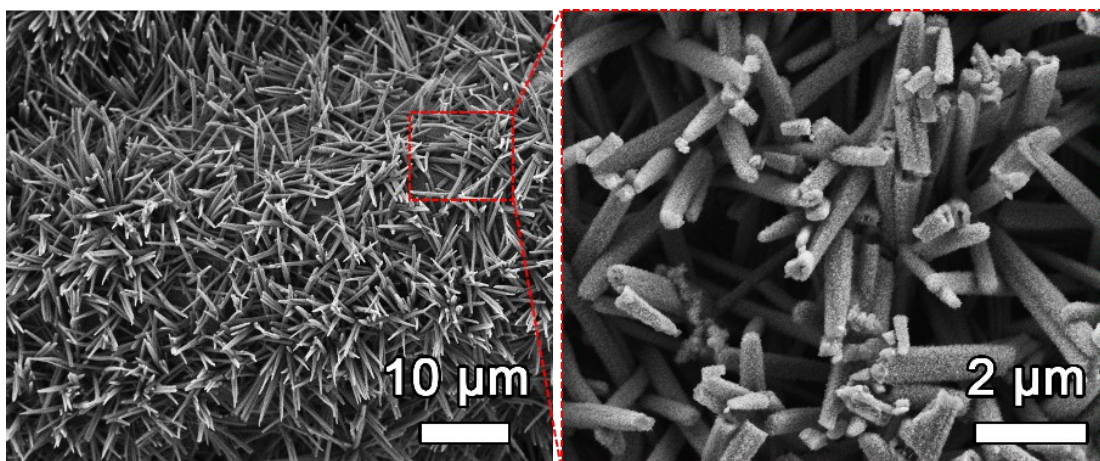

**Figure S5.** CMM-90 nanometer array partially collapsed surface morphology.

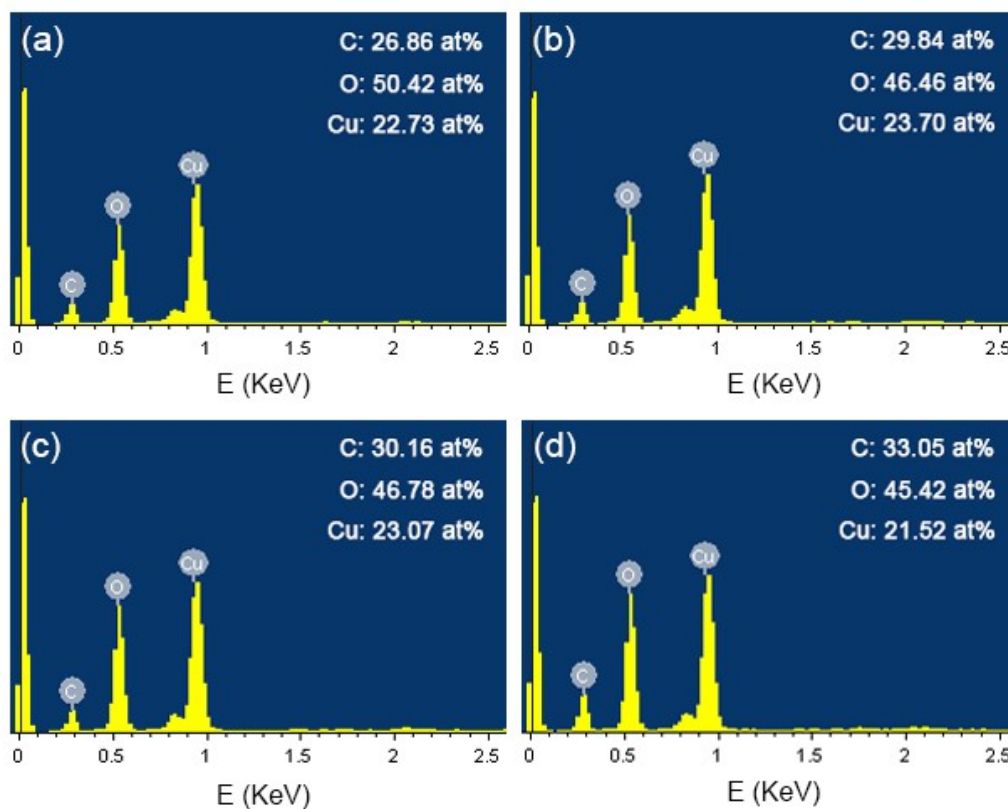

**Figure S6.** EDX spectra of modified mesh samples obtained at different reaction temperature: (a) Cu-MOF-30, (b) Cu-MOF-50, (c) Cu-MOF-70, and (d) Cu-MOF-90.

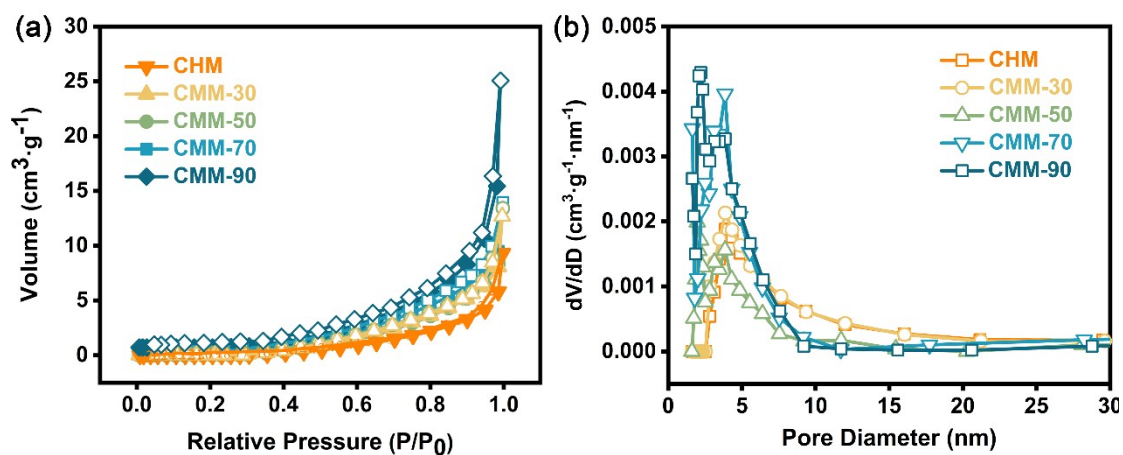

**Figure S7.** (a) Nitrogen adsorption–desorption isotherms and (b) pore size distributions of the modified copper meshes.

**Table S1.** The BET-specific surface area of the modified copper meshes.

| Sample      | $S_{\text{BET}}$<br>(m <sup>2</sup> /g) |
|-------------|-----------------------------------------|
| Copper mesh | /                                       |
| CHM         | 5.13                                    |
| CMM-30      | 9.19                                    |
| CMM-50      | 15.52                                   |
| CMM-70      | 25.34                                   |
| CMM-90      | 22.53                                   |

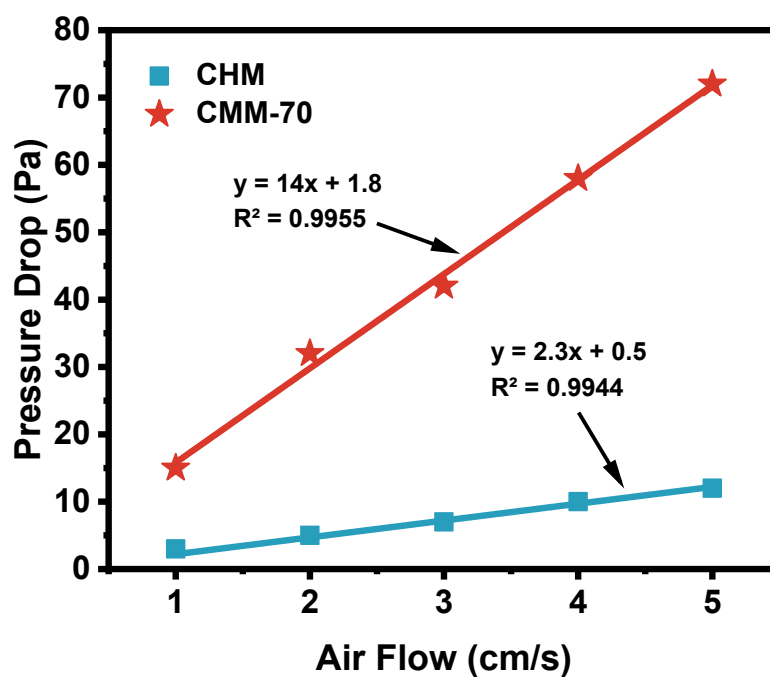

**Figure S8.** The pressure drop of the mesh samples under different airflow rates.

**Table S2.** Comparison of comprehensive PM<sub>2.5</sub> and PM<sub>10</sub> filtration performance of filters via home-made smoke tester at the air flow rate 0.2 m s<sup>-1</sup>.

| PM                | Filter      | E <sup>a</sup> (%) | ΔP <sup>b</sup> (Pa) | Q <sup>c</sup> (Pa <sup>-1</sup> ) |
|-------------------|-------------|--------------------|----------------------|------------------------------------|
| PM <sub>2.5</sub> | Copper mesh | 20.1               | 1                    | -                                  |
|                   | CHM         | 78.8               | 32                   | 0.048                              |
|                   | CMM-30      | 92.2               | 36                   | 0.071                              |
|                   | CMM-50      | 93.5               | 38                   | 0.072                              |
|                   | CMM-70      | 96.0               | 36                   | 0.089                              |
|                   | CMM-90      | 92.8               | 39                   | 0.067                              |
| PM <sub>10</sub>  | Copper mesh | 21.3               | 2                    | -                                  |
|                   | CHM         | 80.5               | 34                   | 0.048                              |
|                   | CMM-30      | 94.1               | 38                   | 0.074                              |
|                   | CMM-50      | 95.7               | 39                   | 0.081                              |
|                   | CMM-70      | 98.5               | 37                   | 0.113                              |
|                   | CMM-90      | 94.3               | 40                   | 0.072                              |

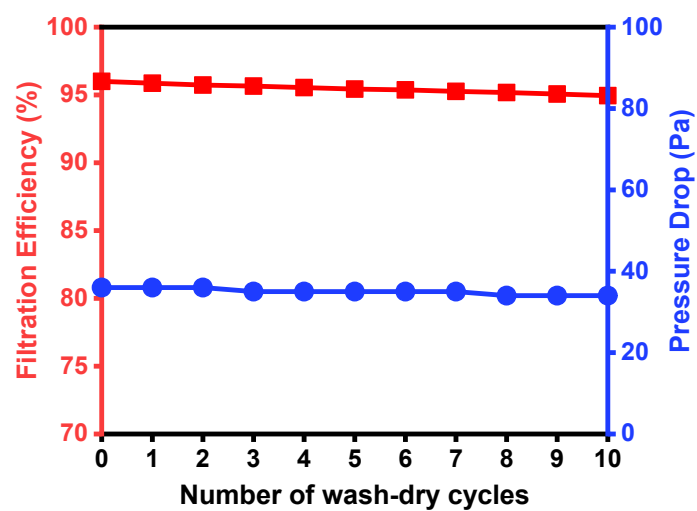

**Figure S9.** PM<sub>2.5</sub> filtration efficiency and pressure drop of the CMM-70 filter after ten filtration–wash–dry cycles.

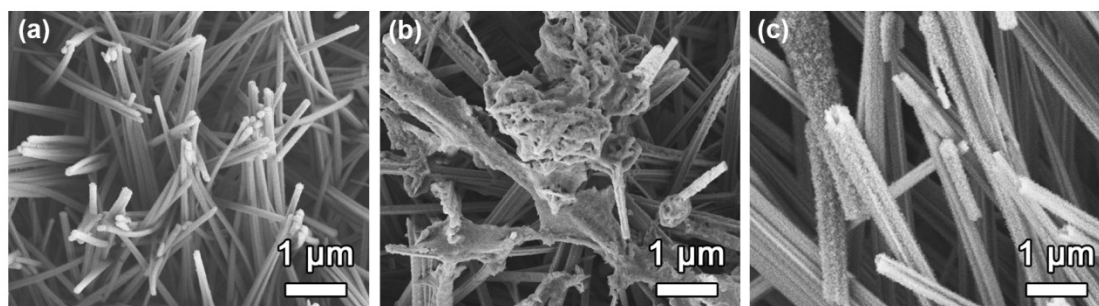

**Figure S10.** SEM images of CMM-70 (a) Before filtration, (b) after filtration, and after ten filtration–wash–dry cycles.

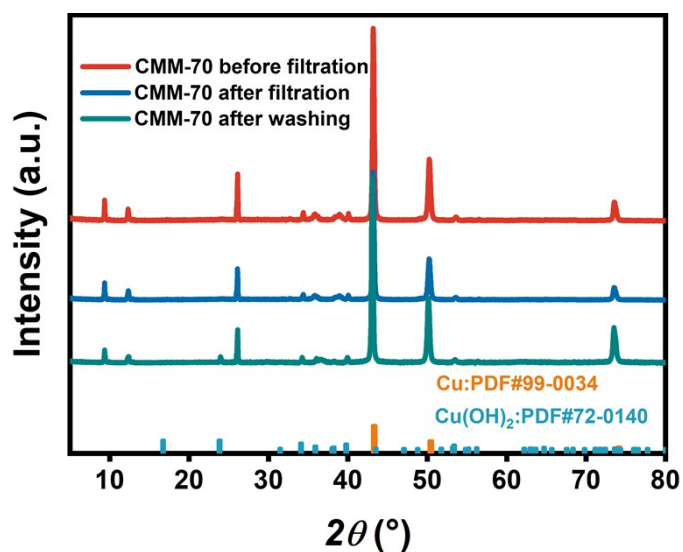

**Figure S11.** XRD pattern of CMM-70 (a) Before filtration, (b) after filtration, and after ten filtration–wash–dry cycles.

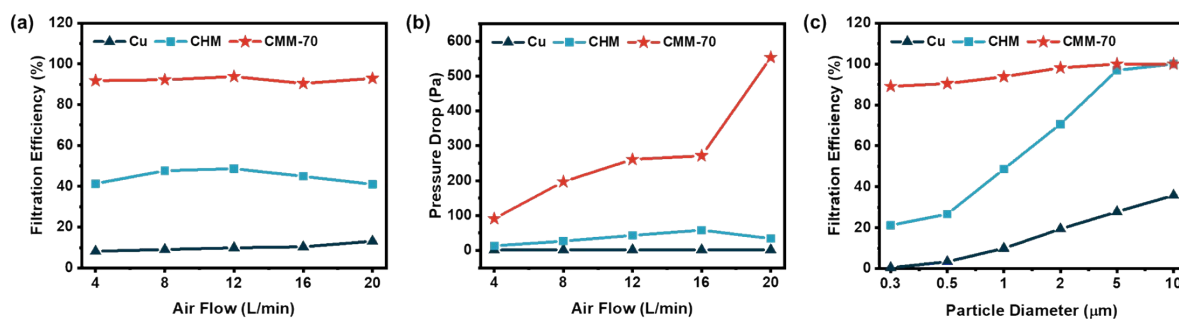

**Figure S12.** Filtration performance of the cooper mesh, CHM, CMM-70 filters: (a) relationship between airflow rate and filtration efficiency. (b) relationship between airflow rate and pressure drop. (c) Relationship between particle size and filtration efficiency at airflow rate of 12 L/min.



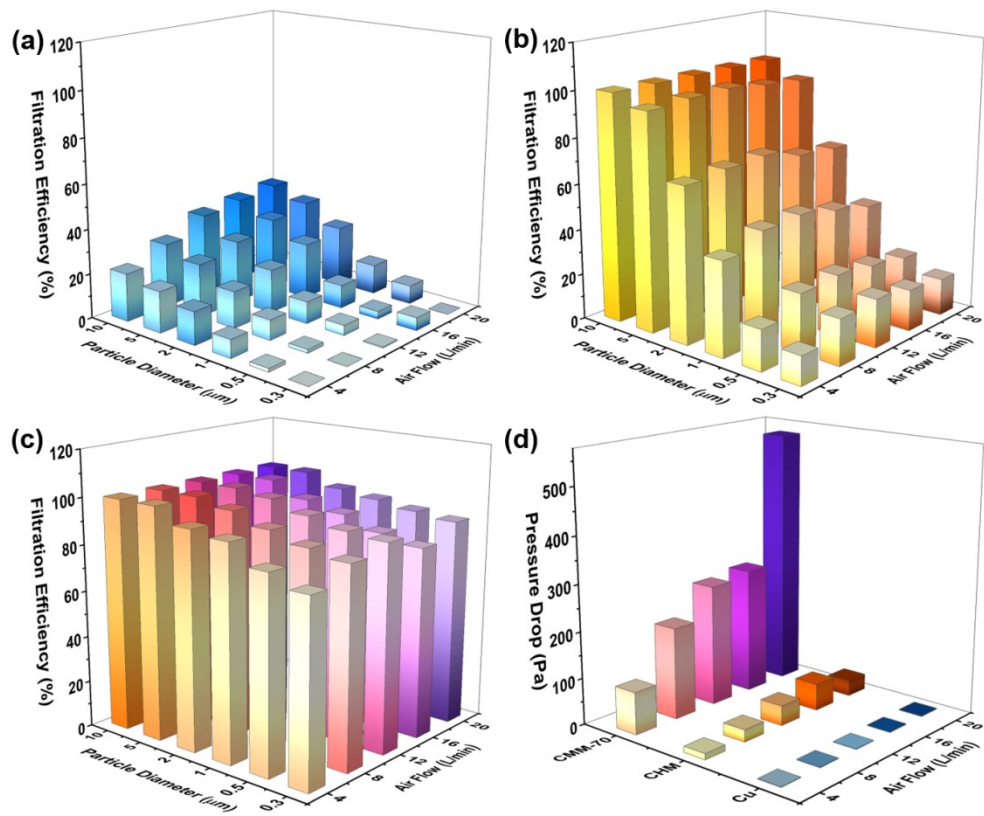

**Figure S13.** Filtration performance of the cooper mesh, CHM, CMM-70 filters.

**Table S3.** Comparison of comprehensive PM filtration performance of filters via commercial filtration system.

| <b>Filter mesh</b> | <b>Air flow (L/min)</b> | <b>Pressure drop (Pa)</b> | <b>0.3 (μm)</b> | <b>0.5 (μm)</b> | <b>1 (μm)</b> | <b>2.5 (μm)</b> | <b>5(μm)</b> | <b>10(μm)</b> |
|--------------------|-------------------------|---------------------------|-----------------|-----------------|---------------|-----------------|--------------|---------------|
| <b>Copper mesh</b> | 4                       | 1                         | 0.00            | 1.56            | 8.22          | 14.82           | 18.47        | 21.46         |
|                    | 8                       | 1.5                       | 0.00            | 4.49            | 9.07          | 16.46           | 23.78        | 28.39         |
|                    | 12                      | 1.5                       | 0.46            | 3.39            | 9.90          | 19.38           | 27.78        | 35.84         |
|                    | 16                      | 1.5                       | 5.77            | 8.20            | 10.37         | 24.76           | 32.05        | 37.62         |
|                    | 20                      | 1.5                       | 0.00            | 10.70           | 13.13         | 26.48           | 34.65        | 37.65         |
| <b>CHM</b>         | 4                       | 13                        | 12.69           | 17.96           | 41.33         | 68.05           | 95.26        | 100           |
|                    | 8                       | 26.5                      | 20.18           | 25.71           | 47.69         | 69.89           | 96.53        | 100           |
|                    | 12                      | 43                        | 21.18           | 26.67           | 48.65         | 70.65           | 96.91        | 100           |
|                    | 16                      | 58                        | 18.074          | 24.14           | 44.94         | 66.07           | 94.70        | 100           |
|                    | 20                      | 34                        | 16.12           | 21.32           | 40.99         | 64.50           | 93.18        | 100           |
| <b>CMM-70</b>      | 4                       | 91                        | 78.45           | 83.50           | 91.79         | 93.66           | 100          | 100           |
|                    | 8                       | 197                       | 85.44           | 88.10           | 92.18         | 97.00           | 100          | 100           |
|                    | 12                      | 261                       | 89.11           | 90.42           | 93.79         | 98.14           | 100          | 100           |
|                    | 16                      | 271.5                     | 82.20           | 85.24           | 90.37         | 93.85           | 100          | 100           |
|                    | 20                      | 553.3                     | 88.85           | 90.55           | 92.89         | 94.96           | 100          | 100           |

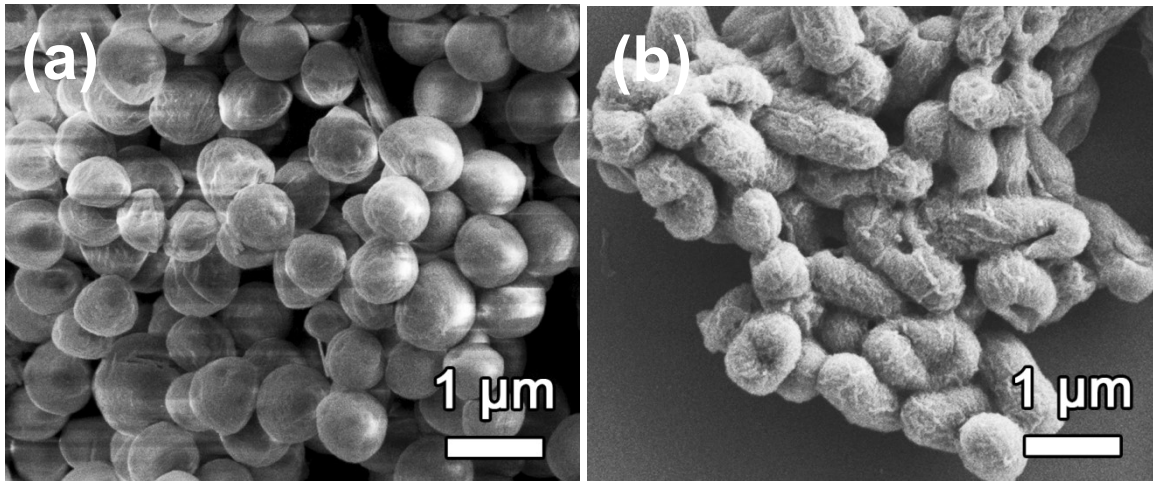

**Figure S14.** Morphologies of (a) *S. aureus* and (b) *E. coli* after antibacterial treatments.
